# Supplementary material for: Healthy Schoolhouse 2.0 Health Promotion Intervention to Reduce Childhood Obesity in Washington, DC: A Feasibility Study
Source: MDPI journal article supplement (doi:10.3390/nu13092935), 2021-08-25
Supplement: s1 [file s1]

**Supplement A: Student Nutrition Literacy Survey<sup>1</sup> Level 2 (Grades 3-5)**

Note: Level 1 Survey (Grades 1 & 2) includes only questions 1-14.

Name: \_\_\_\_\_

Please circle:

Boy

Girl

Circle the best answer for each question.

1) Circle the most nutritious breakfast.

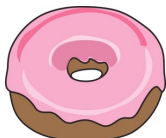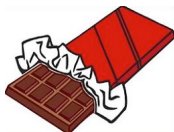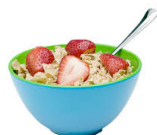

2) Circle the most nutritious drink.

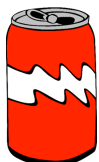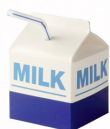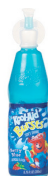

3) Circle the healthy snack.

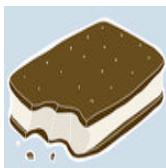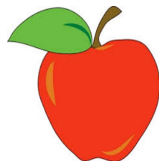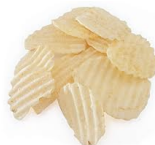

4) Circle the SOMETIMES food.

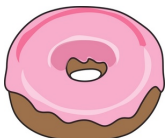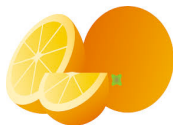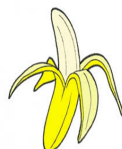

5) Circle the food group that builds strong bones with Vitamin D and Calcium.

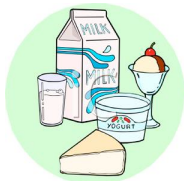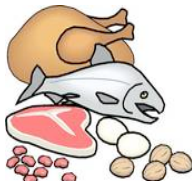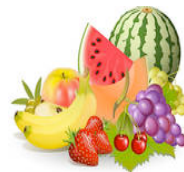

6) Circle the food group that heals cuts and scrapes with Vitamin C.

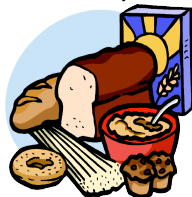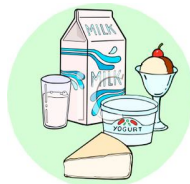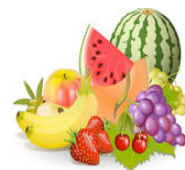

7) Circle the food group that builds muscles **with protein**.

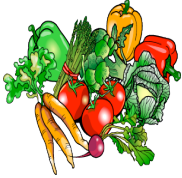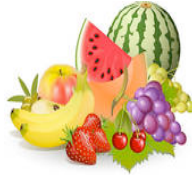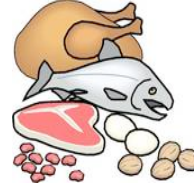

8) Circle the food group that helps eyes see better **with Vitamin A**.

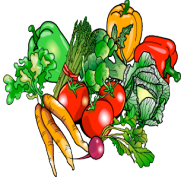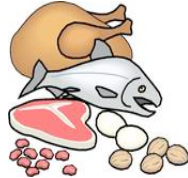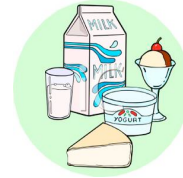

9) Circle the food group that provides the most energy **with Vitamin B**.

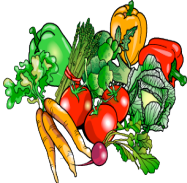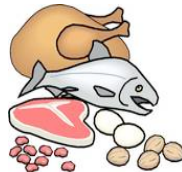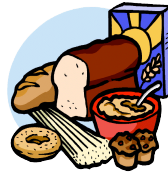

For the next 5 questions, circle yes or no.

|                                                                                |     |    |
|--------------------------------------------------------------------------------|-----|----|
| 10) I like to try new food.                                                    | Yes | No |
| 11) I think fruit tastes good.                                                 | Yes | No |
| 12) I like to eat vegetables.                                                  | Yes | No |
| 13) I will try to drink water or milk instead of soda when I am not in school. | Yes | No |
| 14) Physical activity makes me feel good.                                      | Yes | No |

15) Draw a line to match each taco ingredient to the correct food group. Tomato is matched to the fruit group as an example.

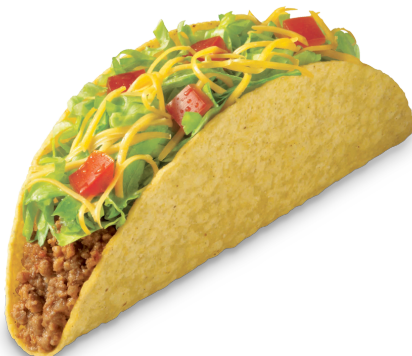

Tomato

Meat or beans

Lettuce

Tortilla or taco shell

Cheese

Vegetable

Grain

Fruit

Dairy

Protein
